# Supplementary material for: Formation of a metal–organic framework with high gas uptakes based upon amino-decorated polyhedral cages
Source: Royal Society of Chemistry journal article supplement (doi:10.1039/c4ra14607g), 2014-12-02
Supplement: c4ra14607g1.pdf [file c4ra14607g1.pdf]

## **Electronic Supporting Information (ESI)**

### **Formation of a Metal-Organic Framework with High Gases Uptakes Based upon Amino-Decorated Polyhedral Cages**

## 1. Low-Pressure Gas Sorption Measurements

In the gas sorption measurements, all of the gases used are of 99.999% purity. Low-pressure (up to 1 bar) nitrogen (N<sub>2</sub>, at 77 K; Ar, at 87 K), hydrogen (H<sub>2</sub>, at 77 and 87 K), carbon dioxide (CO<sub>2</sub>, at 273 and 298 K), methane (CH<sub>4</sub>, at 273 and 298 K), and N<sub>2</sub> (at 273 and 298 K) sorption experiments were carried out on a Micromeritics ASAP 2020 M+C surface area analyzer. For all low-pressure isotherms, warm and cold free space correction measurements were performed using ultra-high purity He gas (UHP grade 5.0, 99.999% purity). A part of the N<sub>2</sub> sorption isotherm at 77 K in the P/P<sub>0</sub> range 0.0003-0.003 was fitted to the BET equation to estimate the BET surface area and the Langmuir surface area calculation was performed using all data points (Figure S1). The pore size distribution (PSD) was obtained from the DFT model in the Micromeritics ASAP2020 software package (assuming split pore geometry) based on the N<sub>2</sub> sorption isotherm.

Isotherm data were analysed using the virial equation:

$$\ln(P) = \ln(N) + (a_0 + a_1N + a_2N^2 + \dots) / T + (b_0 + b_1N + b_2N^2 + \dots);$$

Where P is the pressure, N is the amount adsorbed, and a<sub>0</sub>, a<sub>1</sub>, b<sub>1</sub>, etc. are virial coefficients.

## 2. Estimation of the Enthalpy of Gas Adsorption

A Virial-type function contains the temperature-independent parameters  $a_i$  and  $b_i$  was employed to calculate the enthalpy of adsorption for CO<sub>2</sub> (at 273 and 298 K) on NJU-Bai6. In each case, the data were fitted using the equation:

$$\ln P = \ln N + 1/T \sum_{i=0}^m a_i N^i + \sum_{i=0}^n b_i N^i \quad (1)$$

Here,  $P$  is the pressure in torr,  $N$  is the adsorbed amount in mmol/g,  $T$  is the temperature in K,  $a_i$  and  $b_i$  are Virial coefficients. The values of the virial coefficients  $a_0$  through  $a_m$  were then used to calculate the isosteric enthalpy of adsorption using the following equation.

$$Q_{st} = -R \sum_{i=0}^m a_i N^i \quad (2)$$

$Q_{st}$  is the coverage-dependent isosteric enthalpy of adsorption and  $R$  is the universal gas constant. The enthalpy of sorption of  $\text{CO}_2$  in this manuscript is determined by using the data measured in the pressure range from 0-1 bar (at 273 and 298 K).

## 2. $\text{CO}_2$ Selectivity Calculations

Here, the adsorption capacities of component  $n$  ( $q_n$ ) are defined to be molar absolute adsorption capacities determined experimentally, and  $p_n$  is defined to be the pressure of component  $n$  as experimentally measured. Selectivity ( $S$ ) is defined according to equation:<sup>3</sup>

$$S = \frac{q_{\text{CO}_2}/q_{\text{N}_2}}{p_{\text{CO}_2}/p_{\text{N}_2}} \quad (3)$$

1. G. M. Sheldrick, *Acta Crystallogr., Sect. A*, 2008, **64**, 112.
2. Spek, A. L. *Acta Crystallogr., Sect. A*, 1990, **46**, C34.
3. K. Sumida, D. L. Rogow, J. A. Mason, T. M. McDonald, E. D. Bloch, Z. R. Herm, T. H. Bae and J. R. Long, *Chem. Rev.*, 2012, **112**, 724.

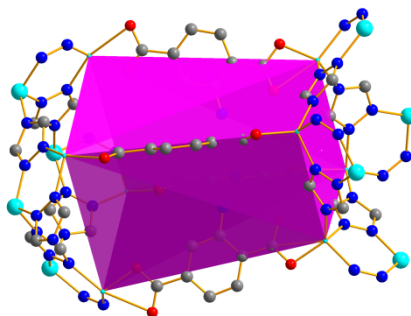

**Figure S1.** The polyhedron constructed by four ATPA and eight Zn atoms.

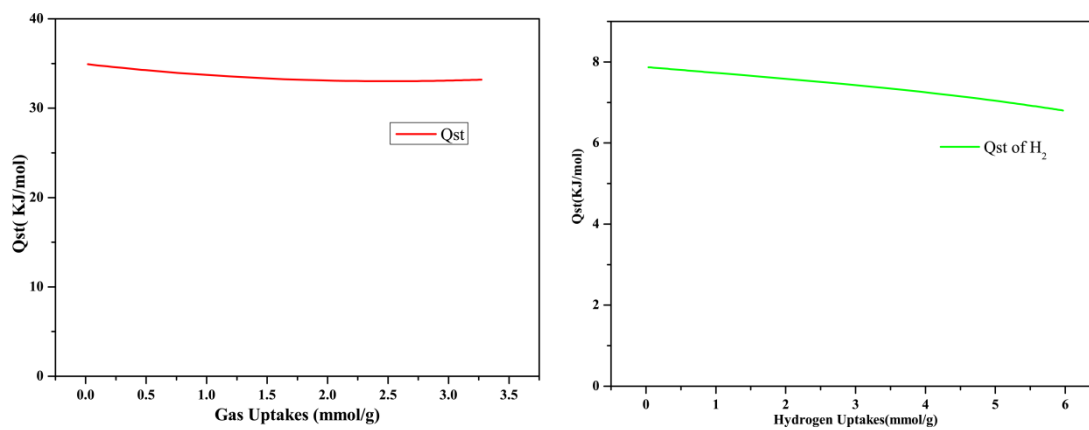

**Figure S2.** The isosteric adsorption enthalpies of CO<sub>2</sub> (left) and H<sub>2</sub> (right).

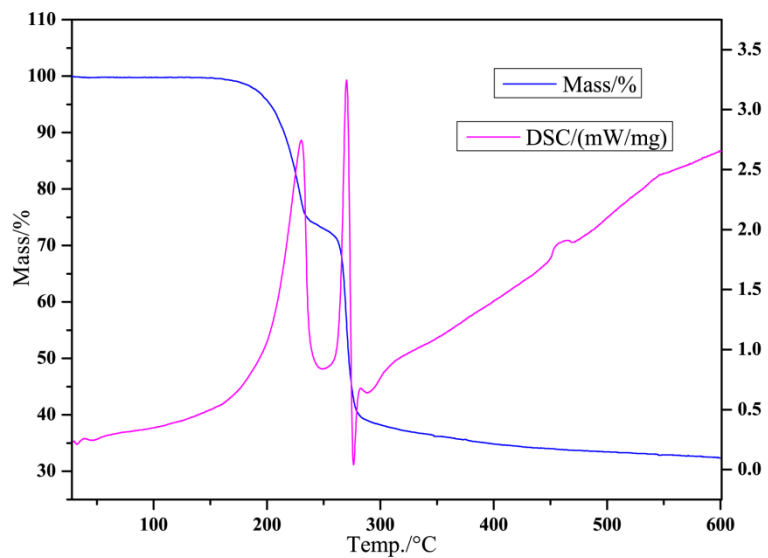

**Figure S3.** TG-DSC curves of 1.

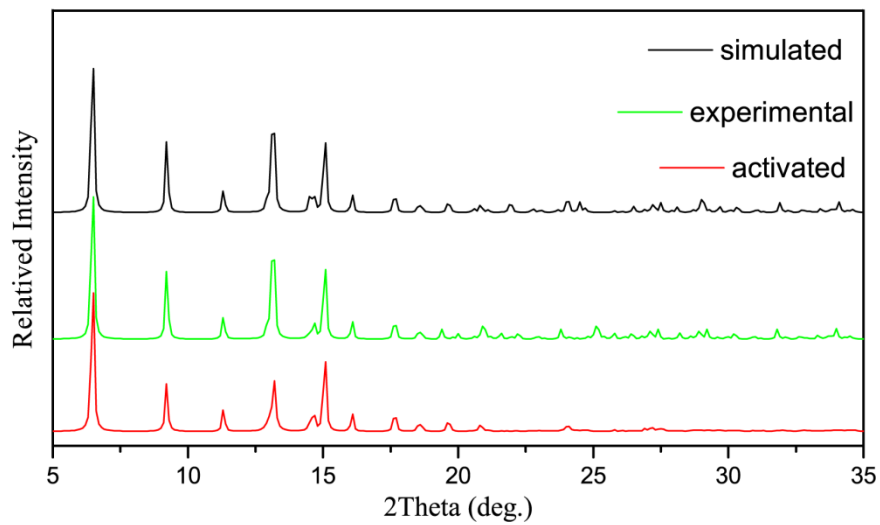

**Figure S4.** PXRD patterns of 1.

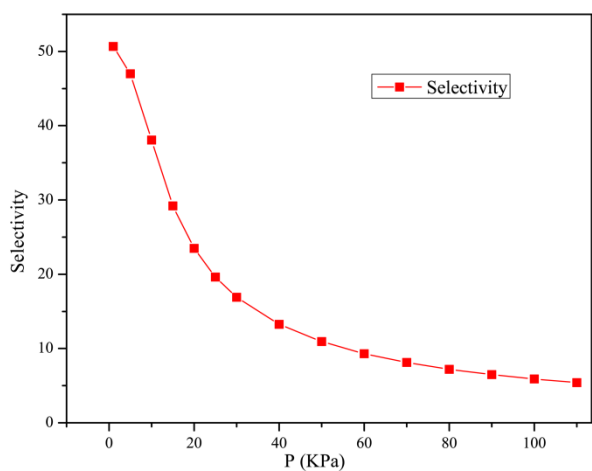

Figure S5 The selectivity of CO<sub>2</sub>/N<sub>2</sub> calculated by IAST.

Figure S5

**Table S1.** Crystal data and structure refinement for **1**.

| <b>compound</b>               | <b>1</b>                                                |
|-------------------------------|---------------------------------------------------------|
| Empirical formula             | C12 H9 N7 O4 Zn2                                        |
| Formula weight                | 446.00                                                  |
| Crystal system                | Tetragonal                                              |
| Space group                   | P4/ncc                                                  |
| Unit cell dimensions.         | a = 13.4537(9) Å<br>b = 13.4537(9) Å<br>c = 27.329(4) Å |
| Volume                        | 4946.6(8) Å <sup>3</sup>                                |
| Z                             | 8                                                       |
| Density (calculated)          | 1.192 g/ cm <sup>3</sup>                                |
| F(000)                        | 1776                                                    |
| Final R indices [I>2sigma(I)] | R1 = 0.0258, wR2 = 0.0537                               |
| R indices (all data)          | R1 = 0.0437, wR2 = 0.0551                               |
